# Supplementary material for: Variability in H9N2 haemagglutinin receptor-binding preference and the pH of fusion
Source: PubMed Central journal article supplement (PMC5378918; doi:10.1038/emi.2016.139), 2017-03-22
Supplement: emi2016139x1.pdf [file emi2016139x1.pdf]

## G1-like Western H9N2

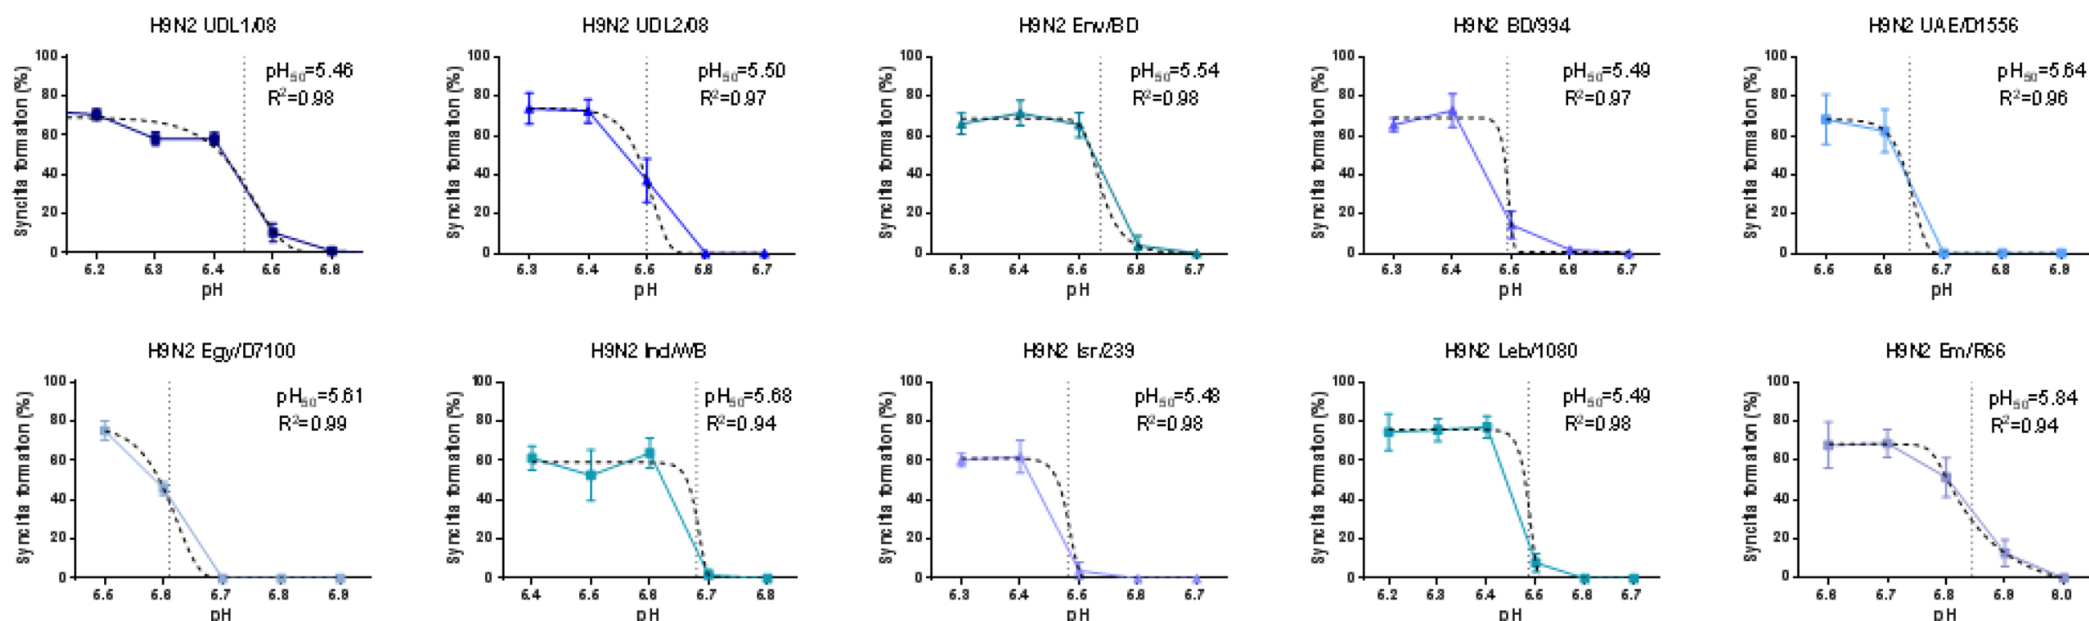

## G1-like Eastern H9N2

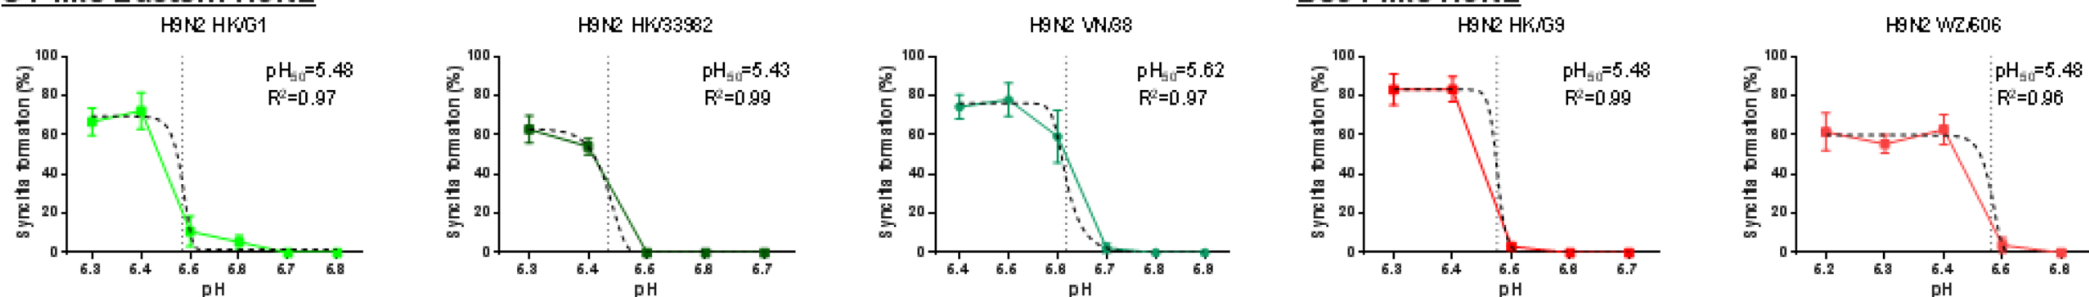

## USA H9N2

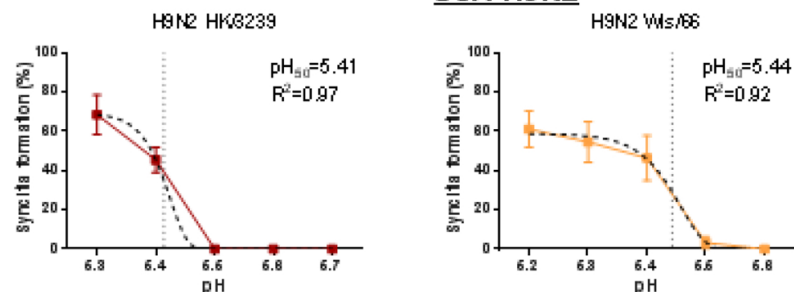

## Human Influenza

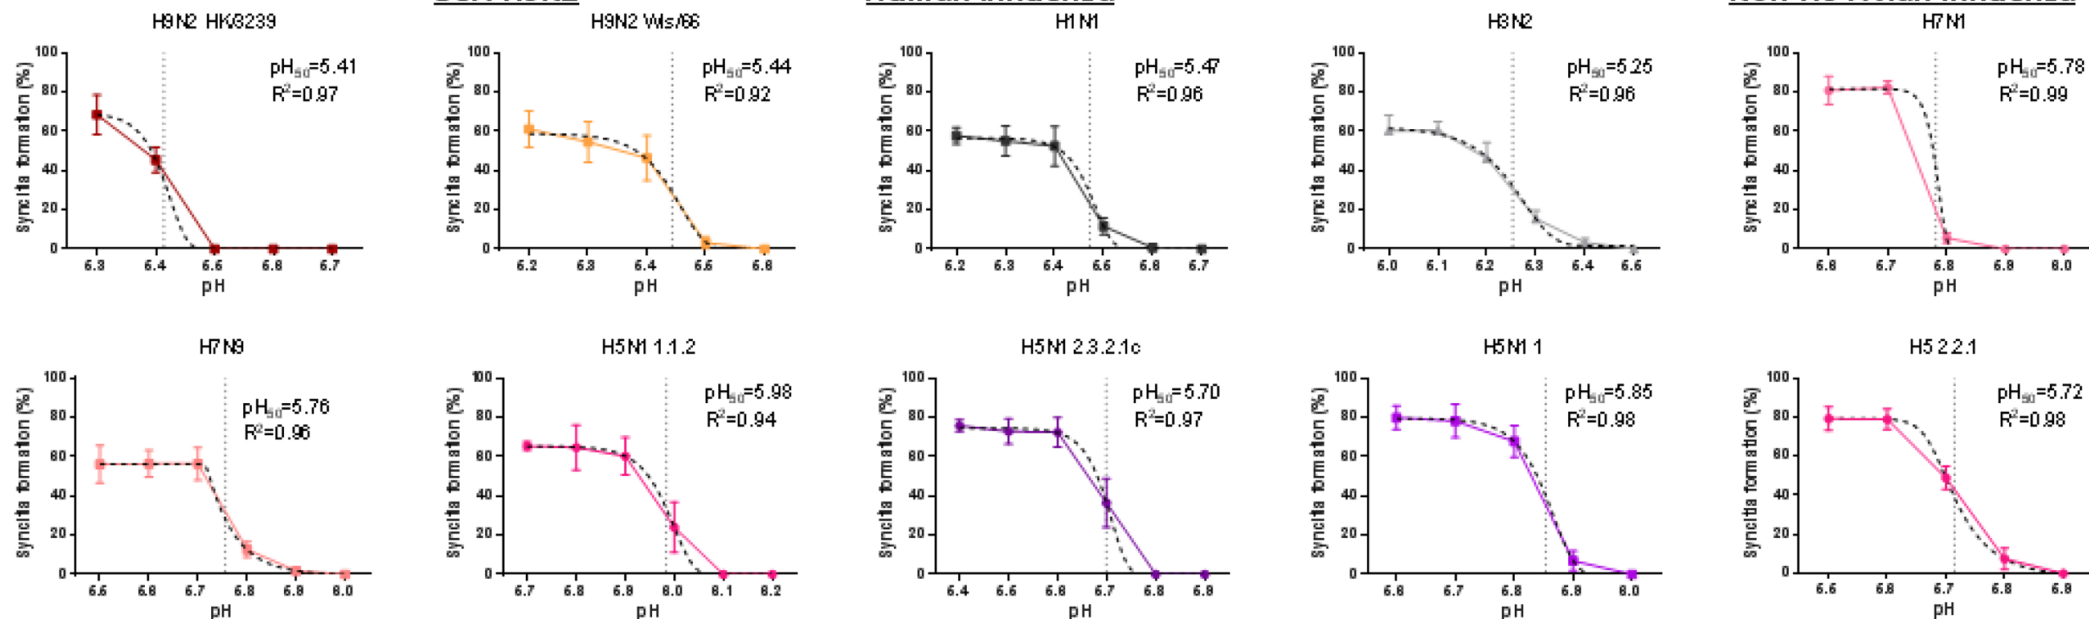

**Supplementary Figure S1** Individual plots of syncytium formation used to predict the pH of 50% fusions. Cells were infected with a high MOI (3 TCID<sub>50</sub>/cell) of virus. 16 hours post-infection cells were treated with TPCK trypsin to activate the HA and then treated with a range of pH buffers. Three hours post-fusion cells were fixed and Giemsa stained. Images of five random fields were used to quantify syncytium formation for each virus. Sigmoidal dose-response curves were then modelled to the data and used to estimate pHs of 50% fusion. R<sup>2</sup> of the sigmoidal curves were also calculated and are shown for each plot.
